# Supplementary material
Source: PubMed Central journal article supplement (PMC3721746)
Supplement: NIHMS470954-supplement-3.pdf [file NIHMS470954-supplement-3.pdf]

## SUPPLEMENTAL MATERIAL

### Appendix 1. STICH Hypothesis 1 Treatment Crossovers/Reasons

| Index Number* | RAR Score | Treatment Received | Crossover Reason Classification | Randomized Treatment | Reason for Crossover                                  |
|---------------|-----------|--------------------|---------------------------------|----------------------|-------------------------------------------------------|
| M-AD1         | 10        | CABG               | Group 1: Acute decompensation   | MED                  | Heart failure, ventricular tachycardia                |
| M-AD2         | 3         | CABG               | Group 1: Acute decompensation   | MED                  | Myocardial infarction with ICD discharge              |
| M-AD3         | 26        | CABG               | Group 1: Acute decompensation   | MED                  | Recurrent syncope, decompensation                     |
| M-AD4         | 10        | CABG               | Group 1: Acute decompensation   | MED                  | ICD for recurrent ventricular tachycardia             |
| M-AD5         | 31        | CABG               | Group 1: Acute decompensation   | MED                  | Unstable heart failure with pulmonary edema           |
| M-AD6         | 15        | CABG               | Group 1: Acute decompensation   | MED                  | Tricuspid endocarditis                                |
| M-AD7         | 8         | CABG               | Group 1: Acute decompensation   | MED                  | Heart failure requiring intra-aortic balloon pump     |
| M-AD8         | 10        | CABG               | Group 1: Acute decompensation   | MED                  | Pulmonary edema                                       |
| M-AD9         | 1         | CABG               | Group 1: Acute decompensation   | MED                  | Ventricular fibrillation, cardiac arrest              |
| M-AD10        | 17        | CABG               | Group 1: Acute decompensation   | MED                  | Worsening heart failure                               |
| M-AD11        | 16        | CABG               | Group 1: Acute decompensation   | MED                  | Myocardial infarction after randomization             |
| M-AD12        | 15        | CABG               | Group 1: Acute decompensation   | MED                  | Cardiac arrest three months after randomization       |
| M-AD13        | 19        | CABG               | Group 1: Acute decompensation   | MED                  | Non-ST myocardial infarction                          |
| M-AD14        | 4         | CABG               | Group 1: Acute decompensation   | MED                  | Angina, pulmonary edema                               |
| M-PS1         | 12        | CABG               | Group 2: Progressive symptoms   | MED                  | Angina on medical therapy                             |
| M-PS2         | 22        | CABG               | Group 2: Progressive symptoms   | MED                  | Unstable angina, syncope                              |
| M-PS3         | 12        | CABG               | Group 2: Progressive symptoms   | MED                  | Angina, left ventricular failure                      |
| M-PS4         | 16        | CABG               | Group 2: Progressive symptoms   | MED                  | Angina on aggressive medical therapy                  |
| M-PS5         | 20        | CABG               | Group 2: Progressive symptoms   | MED                  | Increasing heart failure, Class III                   |
| M-PS6         | 21        | CABG               | Group 2: Progressive symptoms   | MED                  | Angina, homeless patient                              |
| M-PS7         | 27        | CABG               | Group 2: Progressive symptoms   | MED                  | Increasing dyspnea and angina on medical therapy      |
| M-PS8         | 22        | CABG               | Group 2: Progressive symptoms   | MED                  | Severe angina and dyspnea with any activity           |
| M-PS9         | 20        | CABG               | Group 2: Progressive symptoms   | MED                  | Increasing angina                                     |
| M-PS10        | 23        | CABG               | Group 2: Progressive symptoms   | MED                  | Rest dyspnea and angina                               |
| M-PS11        | 7         | CABG               | Group 2: Progressive symptoms   | MED                  | Progressive dyspnea, shortness of breath              |
| M-PS12        | 16        | CABG               | Group 2: Progressive symptoms   | MED                  | Unstable angina                                       |
| M-PS13        | 30        | CABG               | Group 2: Progressive symptoms   | MED                  | Severe mitral regurgitation                           |
| M-PS14        | 20        | CABG               | Group 2: Progressive symptoms   | MED                  | Increasing heart failure requiring hospital admission |
| M-PS15        | 15        | CABG               | Group 2: Progressive symptoms   | MED                  | Persistent ischemia after PCI                         |
| M-PS16        | 10        | CABG               | Group 2: Progressive symptoms   | MED                  | Pulmonary edema                                       |
| M-PS17        | 8         | CABG               | Group 2: Progressive symptoms   | MED                  | CCS III/IV angina                                     |
| M-PS18        | 21        | CABG               | Group 2: Progressive symptoms   | MED                  | Syncope, Class IV angina                              |
| M-PS19        | 12        | CABG               | Group 2: Progressive symptoms   | MED                  | Unstable angina with untreatable symptoms             |
| M-PS20        | 6         | CABG               | Group 2: Progressive symptoms   | MED                  | Heart failure decompensation                          |
| M-PS21        | 3         | CABG               | Group 2: Progressive symptoms   | MED                  | Angina, 3 mm ST depression on exercise test           |
| M-PS22        | 9         | CABG               | Group 2: Progressive symptoms   | MED                  | Class III/IV angina                                   |
| M-PS23        | 15        | CABG               | Group 2: Progressive symptoms   | MED                  | Class II/IV angina                                    |
| M-PS24        | 3         | CABG               | Group 2: Progressive symptoms   | MED                  | Early positive ETT                                    |

| Index Number* | RAR Score | Treatment Received | Crossover Reason Classification     | Randomized Treatment | Reason for Crossover                                |
|---------------|-----------|--------------------|-------------------------------------|----------------------|-----------------------------------------------------|
| M-PS25        | 8         | CABG               | Group 2: Progressive symptoms       | MED                  | Severe pain episodes                                |
| M-PS26        | 1         | CABG               | Group 2: Progressive symptoms       | MED                  | Severe dyspnea, orthopnea                           |
| M-PS27        | 1         | CABG               | Group 2: Progressive symptoms       | MED                  | Unstable angina                                     |
| M-PS28        | 6         | CABG               | Group 2: Progressive symptoms       | MED                  | Unstable angina                                     |
| M-PS29        | 12        | CABG               | Group 2: Progressive symptoms       | MED                  | Limited in daily activities                         |
| M-PS30        | 2         | CABG               | Group 2: Progressive symptoms       | MED                  | Class IV angina on medical therapy                  |
|               |           |                    |                                     |                      |                                                     |
| M-PF1         | 24        | CABG               | Group 3: Patient/family decision    | MED                  | Family advised patient with three prior MIs         |
| M-PF2         | 4         | CABG               | Group 3: Patient/family decision    | MED                  | Patient insisted on CABG                            |
| M-PF3         | 4         | CABG               | Group 3: Patient/family decision    | MED                  | Patient's wife insisted on CABG                     |
| M-PF4         | 1         | CABG               | Group 3: Patient/family decision    | MED                  | Patient changed mind and chose CABG                 |
| M-PF5         | 17        | CABG               | Group 3: Patient/family decision    | MED                  | Patient insisted on CABG after randomization        |
| M-PF6         | 3         | CABG               | Group 3: Patient/family decision    | MED                  | Relatives insisted on CABG                          |
| M-PF7         | 5         | CABG               | Group 3: Patient/family decision    | MED                  | Patient/family decision after randomization         |
| M-PF8         | 5         | CABG               | Group 3: Patient/family decision    | MED                  | Relatives insisted on CABG                          |
| M-PF9         | 22        | CABG               | Group 3: Patient/family decision    | MED                  | Patient changed mind and insisted on CABG           |
| M-PF10        | 14        | CABG               | Group 3: Patient/family decision    | MED                  | Patient changed mind                                |
| M-PF11        | 7         | CABG               | Group 3: Patient/family decision    | MED                  | Patient changed mind four days after randomization  |
| M-PF12        | 9         | CABG               | Group 3: Patient/family decision    | MED                  | Relatives insisted on CABG                          |
| M-PF13        | 6         | CABG               | Group 3: Patient/family decision    | MED                  | Relatives insisted on CABG                          |
| M-PF14        | 1         | CABG               | Group 3: Patient/family decision    | MED                  | Relatives insisted on CABG                          |
| M-PF15        | 1         | CABG               | Group 3: Patient/family decision    | MED                  | Patient changed mind                                |
| M-PF16        | 3         | CABG               | Group 3: Patient/family decision    | MED                  | Change suggested by doctor friend                   |
|               |           |                    |                                     |                      |                                                     |
| M-CD1         | 14        | CABG               | Group 4: Clinical decision          | MED                  | Reversible ischemia on MRI                          |
| M-CD2         | 5         | CABG               | Group 4: Clinical decision          | MED                  | Physician changed mind (3-vessel disease, <50% LM)  |
| M-CD3         | 11        | CABG               | Group 4: Clinical decision          | MED                  | Physician opinion difference (3-vessel and 33% LM)  |
| M-CD4         | 9         | CABG               | Group 4: Clinical decision          | MED                  | Physician opinion difference                        |
| M-CD5         | 13        | CABG               | Group 4: Clinical decision          | MED                  | Physician opinion difference                        |
|               |           |                    |                                     |                      |                                                     |
| C-DW1         | 10        | MED                | Group 1: Died waiting for operation | CABG                 | Patient requested home visit before CABG            |
| C-DW2         | 11        | MED                | Group 1: Died waiting for operation | CABG                 | Died before CABG could have been scheduled          |
| C-DW3         | 22        | MED                | Group 1: Died waiting for operation | CABG                 | Logistic reasons required a two-month delay of CABG |
| C-DW4         | 9         | MED                | Group 1: Died waiting for operation | CABG                 | Died two days after randomization                   |
| C-DW5         | 12        | MED                | Group 1: Died waiting for operation | CABG                 | Died during Christmas - 1 day before scheduled CABG |
|               |           |                    |                                     |                      |                                                     |
| C-PF1         | 10        | MED                | Group 3: Patient/family decision    | CABG                 | Family unsupportive of CABG                         |
| C-PF2         | 29        | MED                | Group 3: Patient/family decision    | CABG                 | Patient changed mind                                |
| C-PF3         | 23        | MED                | Group 3: Patient/family decision    | CABG                 | Patient changed mind                                |
| C-PF4         | 12        | MED                | Group 3: Patient/family decision    | CABG                 | Died at home on medical therapy                     |
| C-PF5         | 14        | MED                | Group 3: Patient/family decision    | CABG                 | Financial constraints, symptoms not severe          |
| C-PF6         | 20        | MED                | Group 3: Patient/family decision    | CABG                 | Patient concern for risk of operation               |
| C-PF7         | 8         | MED                | Group 3: Patient/family decision    | CABG                 | Reconsidered risk as too high                       |
| C-PF8         | 3         | MED                | Group 3: Patient/family decision    | CABG                 | Patient changed mind                                |

| Index Number* | RAR Score | Treatment Received | Crossover Reason Classification    | Randomized Treatment | Reason for Crossover                            |
|---------------|-----------|--------------------|------------------------------------|----------------------|-------------------------------------------------|
| C-PF9         | 13        | MED                | Group 3: Patient/family decision   | CABG                 | Family physician said no                        |
| C-PF10        | 31        | MED                | Group 3: Patient/family decision   | CABG                 | Patient changed mind                            |
| C-PF11        | 31        | MED                | Group 3: Patient/family decision   | CABG                 | Patient refused CABG                            |
| C-PF12        | 27        | MED                | Group 3: Patient/family decision   | CABG                 | Feeling too good for CABG                       |
| C-PF13        | 7         | MED                | Group 3: Patient/family decision   | CABG                 | Patient had PCI at non-STICH center             |
| C-PF14        | 4         | MED                | Group 3: Patient/family decision   | CABG                 | Patient decided risk too high                   |
| C-PF15        | 32        | MED                | Group 3: Patient/family decision   | CABG                 | Patient became fearful                          |
| C-PF16        | 3         | MED                | Group 3: Patient/family decision   | CABG                 | Fearful of planned redo CABG                    |
| C-PF17        | 14        | MED                | Group 3: Patient/family decision   | CABG                 | Withdrew near time of operation                 |
| C-PF18        | 32        | MED                | Group 3: Patient/family decision   | CABG                 | Patient's wife not supportive of CABG           |
| C-PF19        | 32        | MED                | Group 3: Patient/family decision   | CABG                 | Virus delayed/canceled CABG                     |
| C-PF20        | 22        | MED                | Group 3: Patient/family decision   | CABG                 | Patient declined                                |
| C-PF21        | 13        | MED                | Group 3: Patient/family decision   | CABG                 | Patient declined                                |
| C-PF22        | 20        | MED                | Group 3: Patient/family decision   | CABG                 | Patient declined                                |
| C-PF23        | 11        | MED                | Group 3: Patient/family decision   | CABG                 | Prostate cancer found                           |
| C-PF24        | 9         | MED                | Group 3: Patient/family decision   | CABG                 | Patient declined CABG                           |
| C-PF25        | 7         | MED                | Group 3: Patient/family decision   | CABG                 | URI delayed CABG, never performed               |
| C-PF26        | 4         | MED                | Group 3: Patient/family decision   | CABG                 | Patient feared CABG                             |
| C-PF27        | 19        | MED                | Group 3: Patient/family decision   | CABG                 | Patient withdrew consent for redo CABG          |
| C-PF28        | 11        | MED                | Group 3: Patient/family decision   | CABG                 | Treated with cardiac pacing instead             |
| C-PF29        | 9         | MED                | Group 3: Patient/family decision   | CABG                 | Patient feared risk                             |
| C-PF30        | 30        | MED                | Group 3: Patient/family decision   | CABG                 | Patient refused CABG                            |
| C-PF31        | 14        | MED                | Group 3: Patient/family decision   | CABG                 | Patient refused CABG                            |
| C-PF32        | 7         | MED                | Group 3: Patient/family decision   | CABG                 | Patient refused CABG and received PCI           |
| C-PF33        | 7         | MED                | Group 3: Patient/family decision   | CABG                 | Declined redo CABG                              |
| C-PF34        | 6         | MED                | Group 3: Patient/family decision   | CABG                 | Declined redo CABG                              |
| C-PF35        | 2         | MED                | Group 3: Patient/family decision   | CABG                 | Non-STICH physicians offered PCI                |
| C-PF36        | 18        | MED                | Group 3: Patient/family decision   | CABG                 | Patient's insurance carrier denied coverage     |
| C-PF37        | 5         | MED                | Group 3: Patient/family decision   | CABG                 | Declined as operation date neared               |
|               |           |                    |                                    |                      |                                                 |
| C-CD1         | 6         | MED                | Group 4: Clinical decision         | CABG                 | While CABG waitlisted, patient had 1-vessel PCI |
| C-CD2         | 32        | MED                | Group 4: Clinical decision         | CABG                 | Veins found to be too small for CABG conduit    |
| C-CD3         | 10        | MED                | Group 4: Clinical decision         | CABG                 | Lung cancer found, no CABG                      |
| C-CD4         | 21        | MED                | Group 4: Clinical decision         | CABG                 | Poor lung function, PCI not CABG performed      |
| C-CD5         | 9         | MED                | Group 4: Clinical decision         | CABG                 | Veins inadequate for conduit                    |
| C-CD6         | 1         | MED                | Group 4: Clinical decision         | CABG                 | Coronary "lesion" was spasm                     |
| C-CD7         | 14        | MED                | Group 4: Clinical decision         | CABG                 | Surgeons reassessed risk                        |
| C-CD8         | 9         | MED                | Group 4: Clinical decision         | CABG                 | Risk reassessed as too high - EF 0.11, not 0.24 |
| C-CD9         | 19        | MED                | Group 4: Clinical decision         | CABG                 | Risk reassessed as too high - EF 11% with MR    |
| C-CD10        | 7         | MED                | Group 4: Clinical decision         | CABG                 | Arrhythmia ablation instead of CABG chosen      |
| C-CD11        | 17        | MED                | Group 4: Clinical decision         | CABG                 | Non-viable test result after randomization      |
|               |           |                    |                                    |                      |                                                 |
| C-PM1         | 9         | MED                | Group 5: Provider miscommunication | CABG                 | Research to clinical staff                      |

| <b>Index Number*</b> | <b>RAR Score</b> | <b>Treatment Received</b> | <b>Crossover Reason Classification</b> | <b>Randomized Treatment</b> | <b>Reason for Crossover</b>  |
|----------------------|------------------|---------------------------|----------------------------------------|-----------------------------|------------------------------|
| C-PM2                | 18               | MED                       | Group 5: Provider miscommunication     | CABG                        | Cardiology to research staff |

\*coded version to protect patient ID numbers
